# Supplementary material for: Anti-Wrinkling Effect of 3,4,5-tri-O-caffeoylquinic Acid from the Roots of Nymphoides peltata through MAPK/AP-1, NF-κB, and Nrf2 Signaling in UVB-Irradiated HaCaT Cells
Source: MDPI journal article supplement (doi:10.3390/antiox12101899), 2023-10-23

## Supplementary data

---

### **Anti-Wrinkling Effect of 3,4,5-tri-*O*-Caffeoylquinic Acid from the Roots of *Nymphoides peltata* through MAPK/AP-1, NF- $\kappa$ B, and Nrf2 Signaling in UVB-Irradiated HaCaT Cells**

Tae-Young Kim <sup>1,†</sup>, No-June Park <sup>2,3,†</sup>, Beom-Geun Jo <sup>1,†</sup>, Bum Soo Lee <sup>4</sup>, Min-Ji Keem <sup>1</sup>, Taek-Hwan Kwon <sup>1</sup>,  
Ki Hyun Kim <sup>4,\*</sup>, Su-Nam Kim <sup>2,3,\*</sup> and Min Hye Yang <sup>1,\*</sup>

<sup>1</sup> Department of Pharmacy, College of Pharmacy and Research Institute for Drug Development,  
Pusan National University, Busan 46241, Republic of Korea

<sup>2</sup> Natural Products Research Institute, Korea Institute of Science and Technology,  
Gangneung 25451, Republic of Korea

<sup>3</sup> Division of Bio-Medical Science and Technology, KIST School, University of Science and Technology,  
Seoul 02792, Republic of Korea

<sup>4</sup> School of Pharmacy, Sungkyunkwan University, Suwon 16419, Republic of Korea

\* Correspondence: khkim83@skku.edu (K.H.K.); snkim@kist.re.kr (S.-N.K.); mhyang@pusan.ac.kr (M.H.Y.);  
Tel.: +82-31-290-7700 (K.H.K.); +82-33-650-3503 (S.-N.K.); +82-51-510-2811 (M.H.Y.);  
Fax: +82-31-290-7730 (K.H.K.); +82-33-650-3419 (S.-N.K.); +82-51-513-6754 (M.H.Y.)

<sup>†</sup> These authors contributed equally to this work.

## Supplementary Data Contents:

|                                                                                                        |     |
|--------------------------------------------------------------------------------------------------------|-----|
| <b>Figure S1.</b> The $^1\text{H}$ NMR spectrum of compound <b>1</b> (Chloroform- $d$ , 500 MHz) ..... | S1  |
| <b>Figure S2.</b> The $^1\text{H}$ NMR spectrum of compound <b>2</b> (DMSO- $d_6$ , 400 MHz).....      | S2  |
| <b>Figure S3.</b> The $^{13}\text{C}$ NMR spectrum of compound <b>2</b> (DMSO- $d_6$ , 100 MHz).....   | S3  |
| <b>Figure S4.</b> The $^1\text{H}$ - $^1\text{H}$ COSY spectrum of compound <b>2</b> .....             | S4  |
| <b>Figure S5.</b> The HSQC spectrum of compound <b>2</b> .....                                         | S5  |
| <b>Figure S6.</b> The HMBC spectrum of compound <b>2</b> .....                                         | S6  |
| <b>Figure S7.</b> The $^1\text{H}$ NMR spectrum of compound <b>3</b> (DMSO- $d_6$ , 400 MHz).....      | S7  |
| <b>Figure S8.</b> The $^1\text{H}$ NMR spectrum of compound <b>4</b> (DMSO- $d_6$ , 400 MHz).....      | S8  |
| <b>Figure S9.</b> The $^1\text{H}$ NMR spectrum of compound <b>5</b> (DMSO- $d_6$ , 400 MHz).....      | S9  |
| <b>Figure S10.</b> The $^1\text{H}$ NMR spectrum of compound <b>6</b> (DMSO- $d_6$ , 400 MHz).....     | S10 |
| <b>Figure S11.</b> The $^1\text{H}$ NMR spectrum of compound <b>7</b> (DMSO- $d_6$ , 400 MHz).....     | S11 |
| <b>Figure S12.</b> The $^1\text{H}$ NMR spectrum of compound <b>8</b> (DMSO- $d_6$ , 400 MHz).....     | S12 |
| <b>Figure S13.</b> The $^1\text{H}$ NMR spectrum of compound <b>9</b> (DMSO- $d_6$ , 400 MHz).....     | S13 |
| <b>Figure S14.</b> The $^1\text{H}$ NMR spectrum of compound <b>10</b> (DMSO- $d_6$ , 400 MHz).....    | S14 |
| <b>Figure S15.</b> The $^1\text{H}$ NMR spectrum of compound <b>11</b> (DMSO- $d_6$ , 400 MHz).....    | S15 |
| <b>Figure S16.</b> The $^1\text{H}$ NMR spectrum of compound <b>12</b> (DMSO- $d_6$ , 400 MHz).....    | S16 |
| <b>Figure S17.</b> The $^1\text{H}$ NMR spectrum of compound <b>13</b> (DMSO- $d_6$ , 400 MHz).....    | S17 |
| <b>Figure S18.</b> The $^1\text{H}$ NMR spectrum of compound <b>14</b> (DMSO- $d_6$ , 400 MHz).....    | S18 |
| <b>Figure S19.</b> The $^1\text{H}$ NMR spectrum of compound <b>15</b> (DMSO- $d_6$ , 400 MHz).....    | S19 |

**Figure S1.** The  $^1\text{H}$  NMR spectrum of compound **1** (Chloroform- $d$ , 500 MHz)

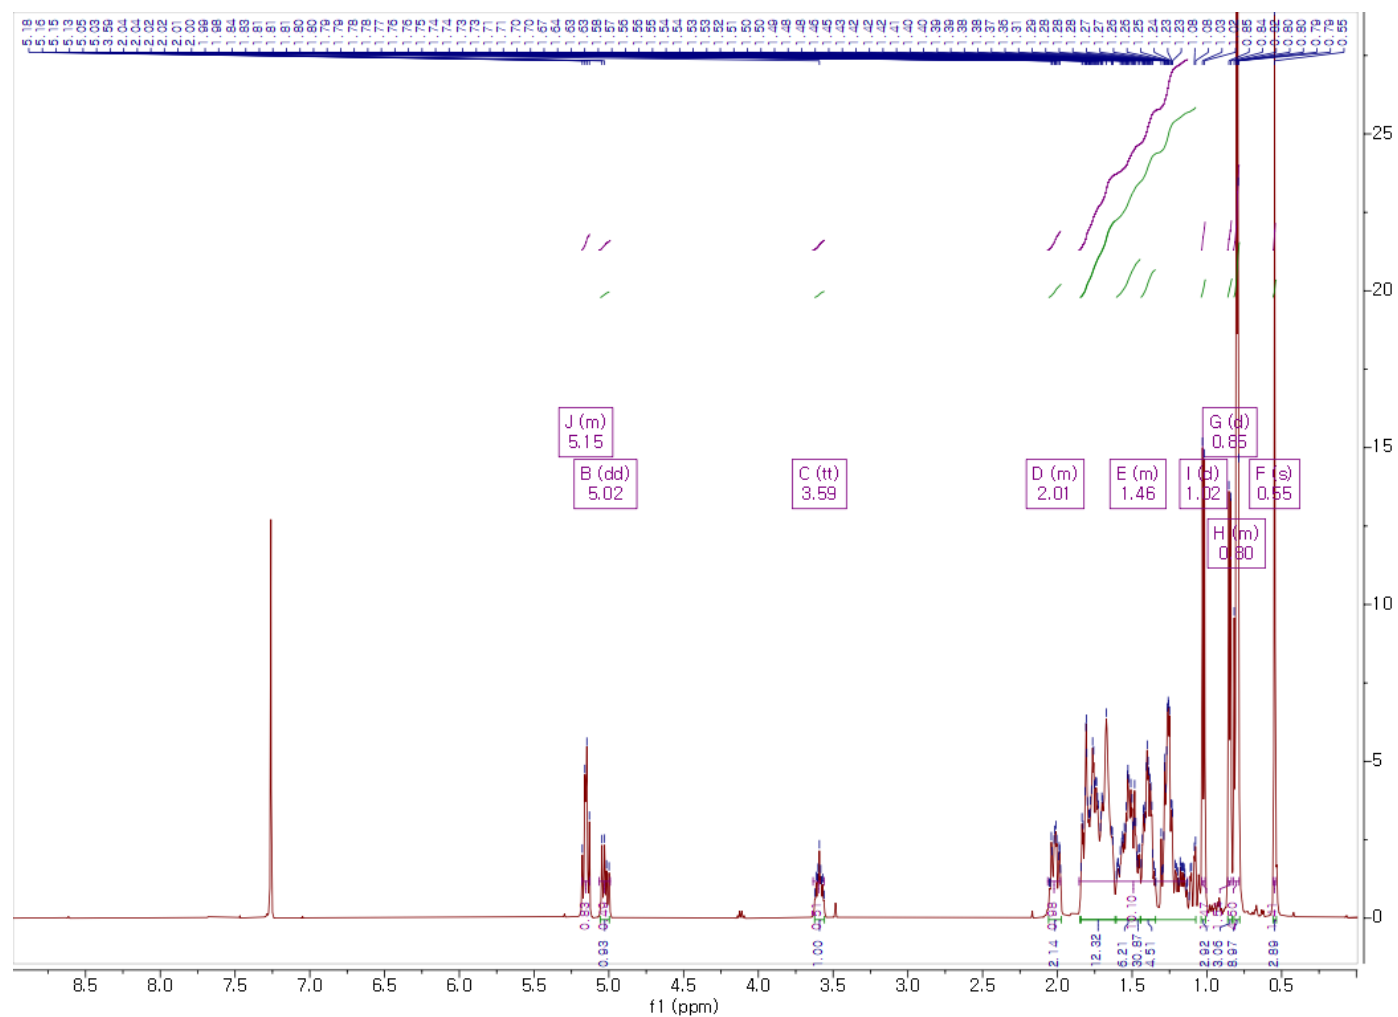

**Figure S2.** The  $^1\text{H}$  NMR spectrum of compound **2** ( $\text{DMSO}-d_6$ , 400 MHz)

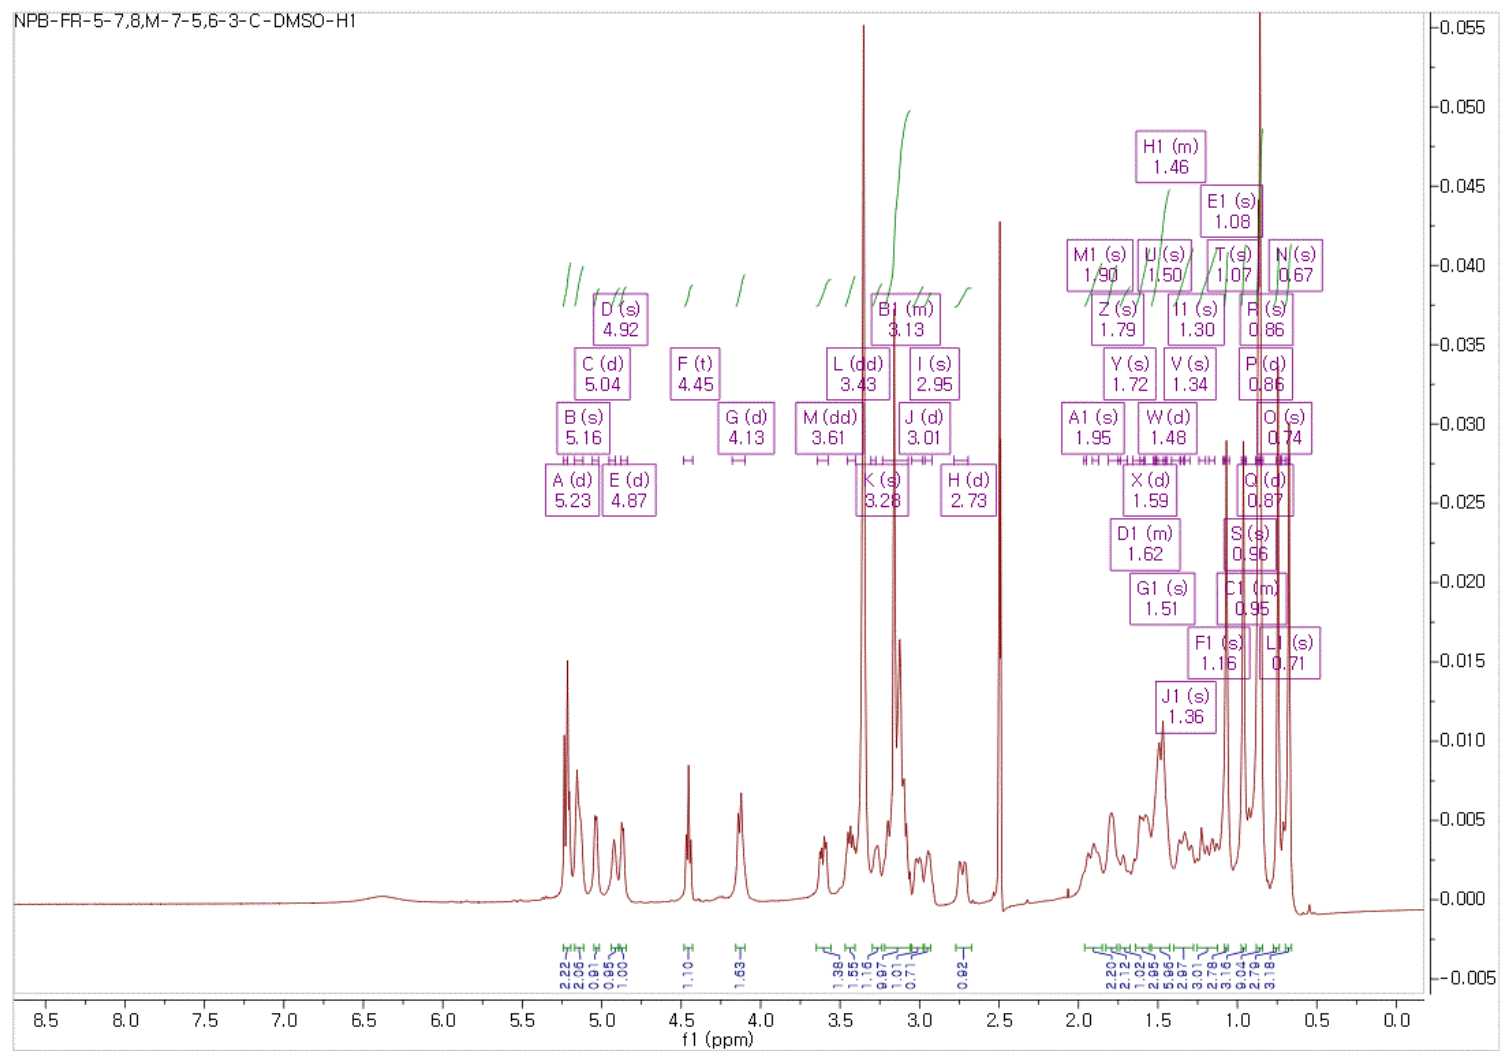

**Figure S3.** The  $^{13}\text{C}$  NMR spectrum of compound **2** (DMSO- $d_6$ , 100 MHz)

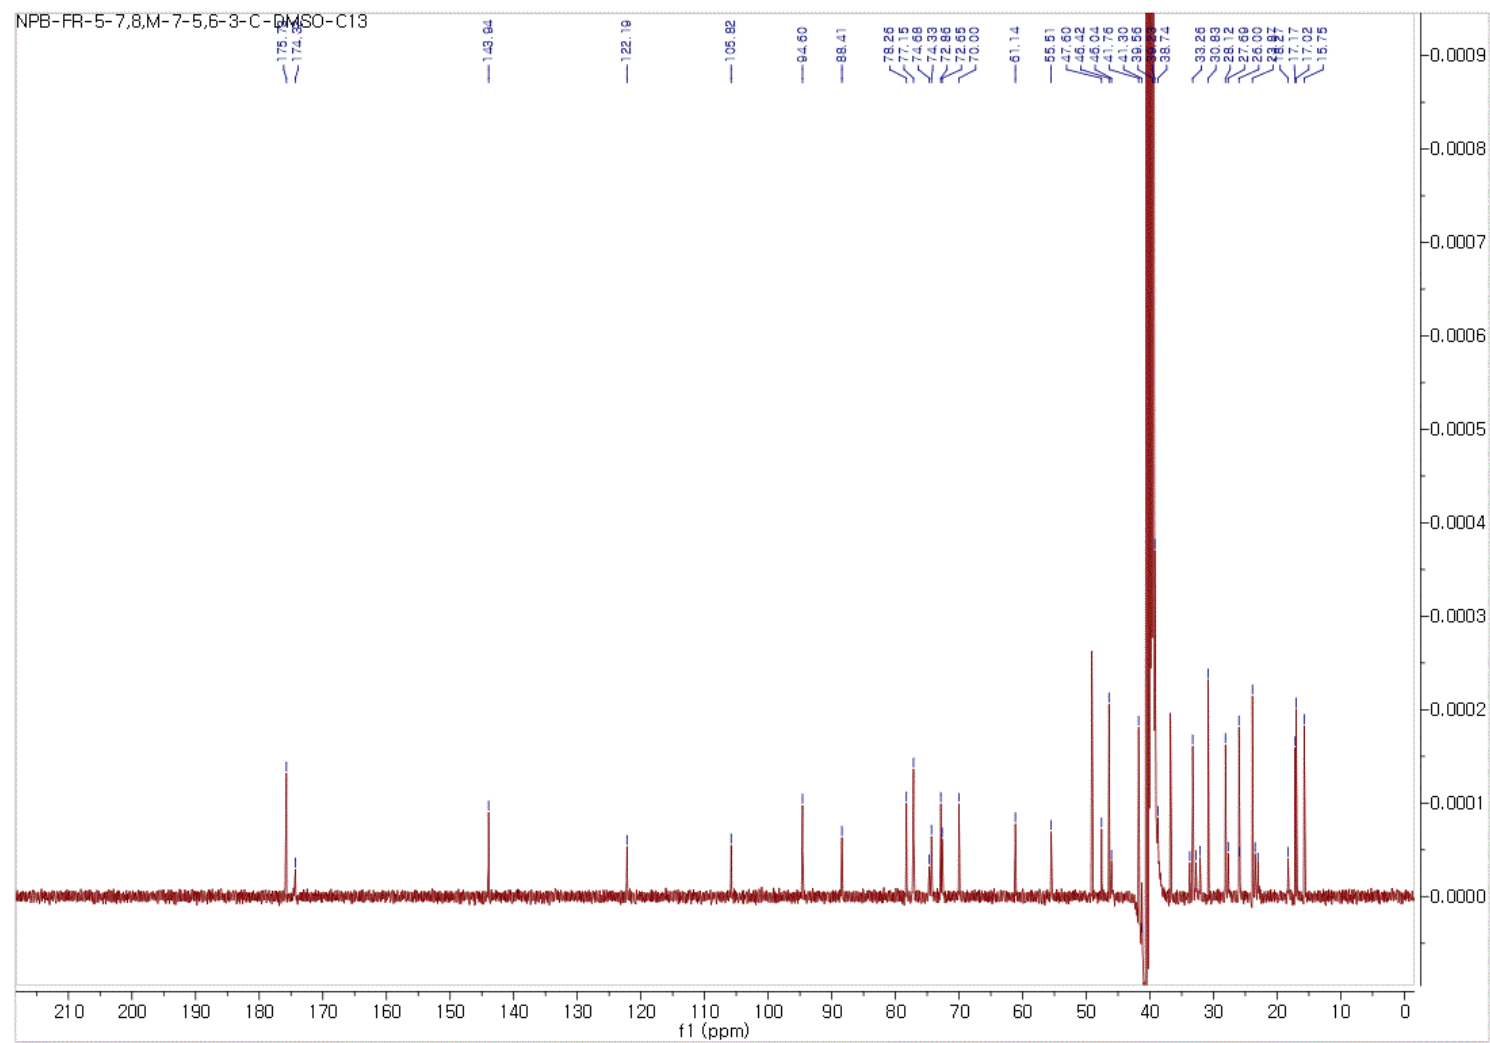

**Figure S4.** The  $^1\text{H}$ - $^1\text{H}$  COSY spectrum of compound **2**

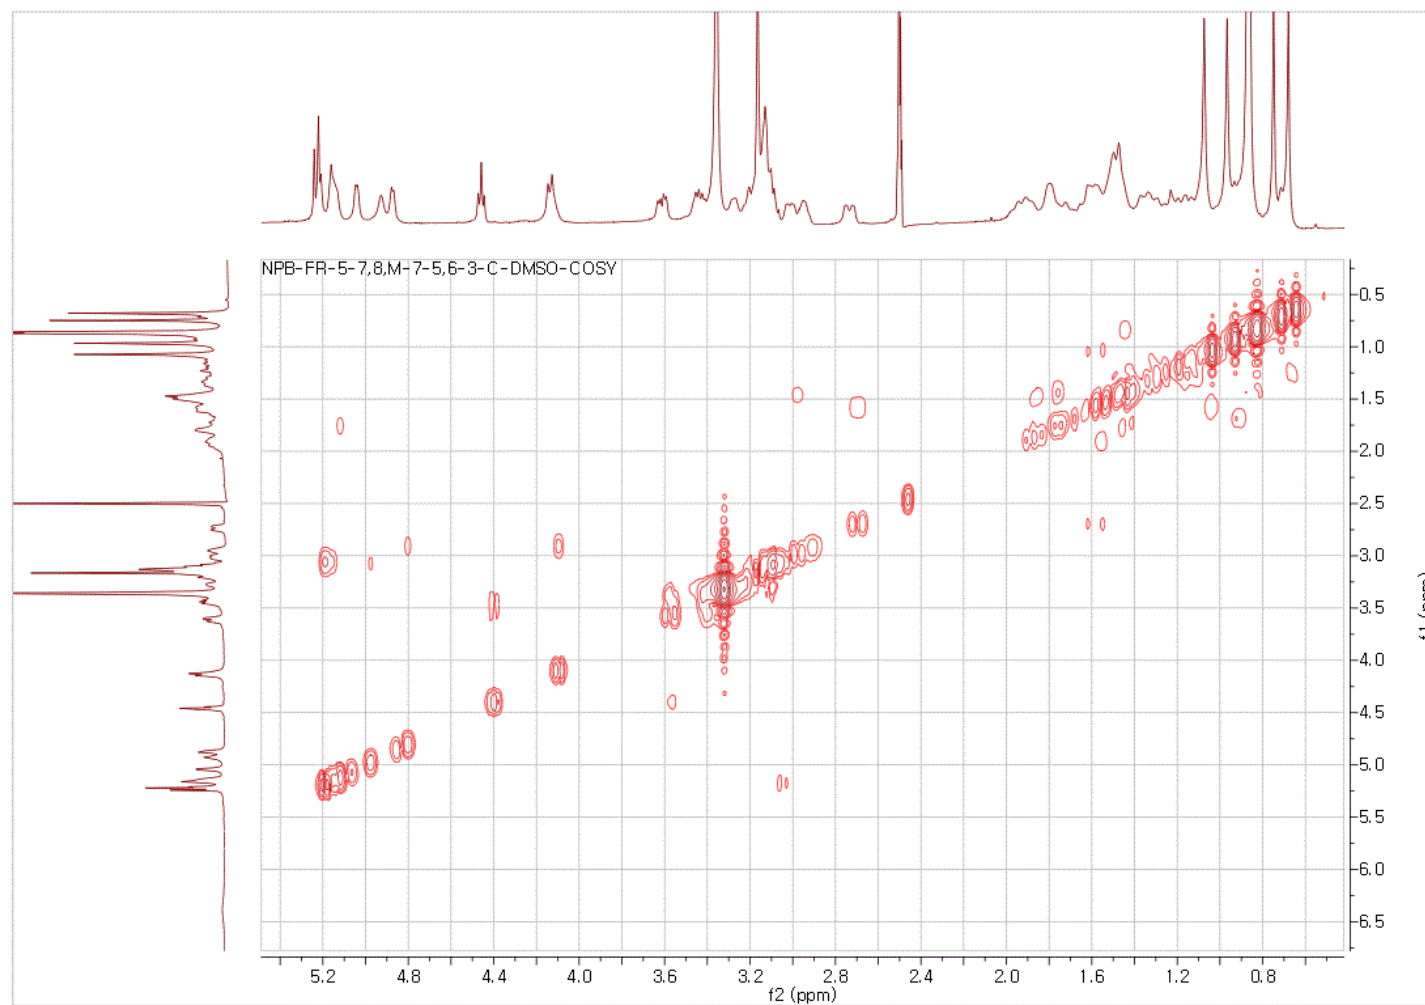

**Figure S5.** The HSQC spectrum of compound **2**

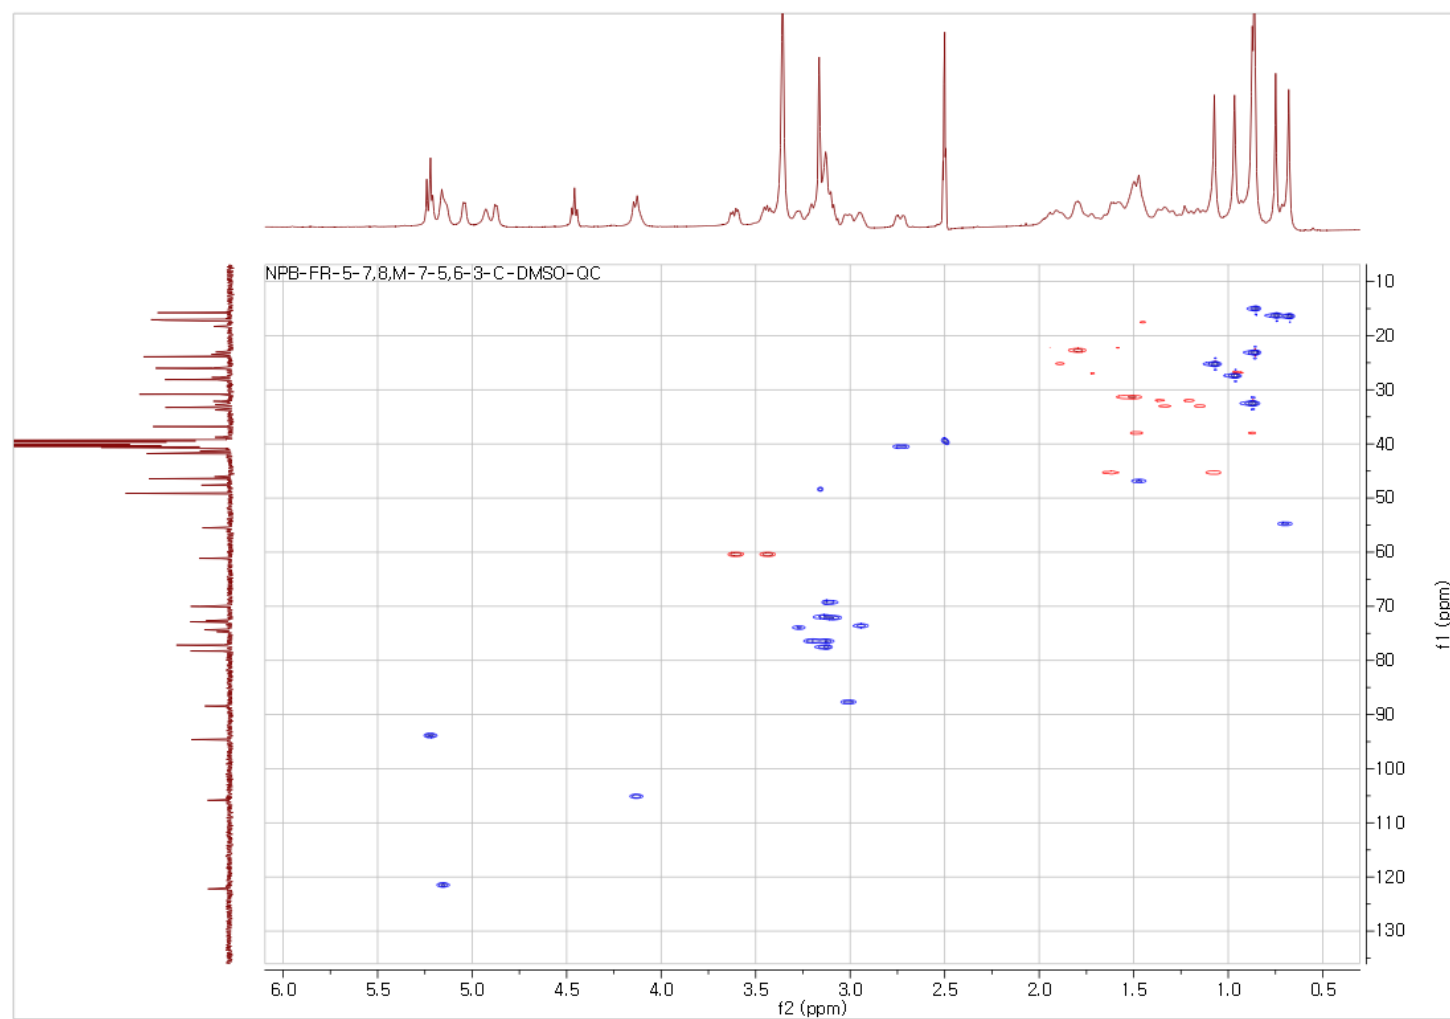

**Figure S6.** The HMBC spectrum of compound **2**

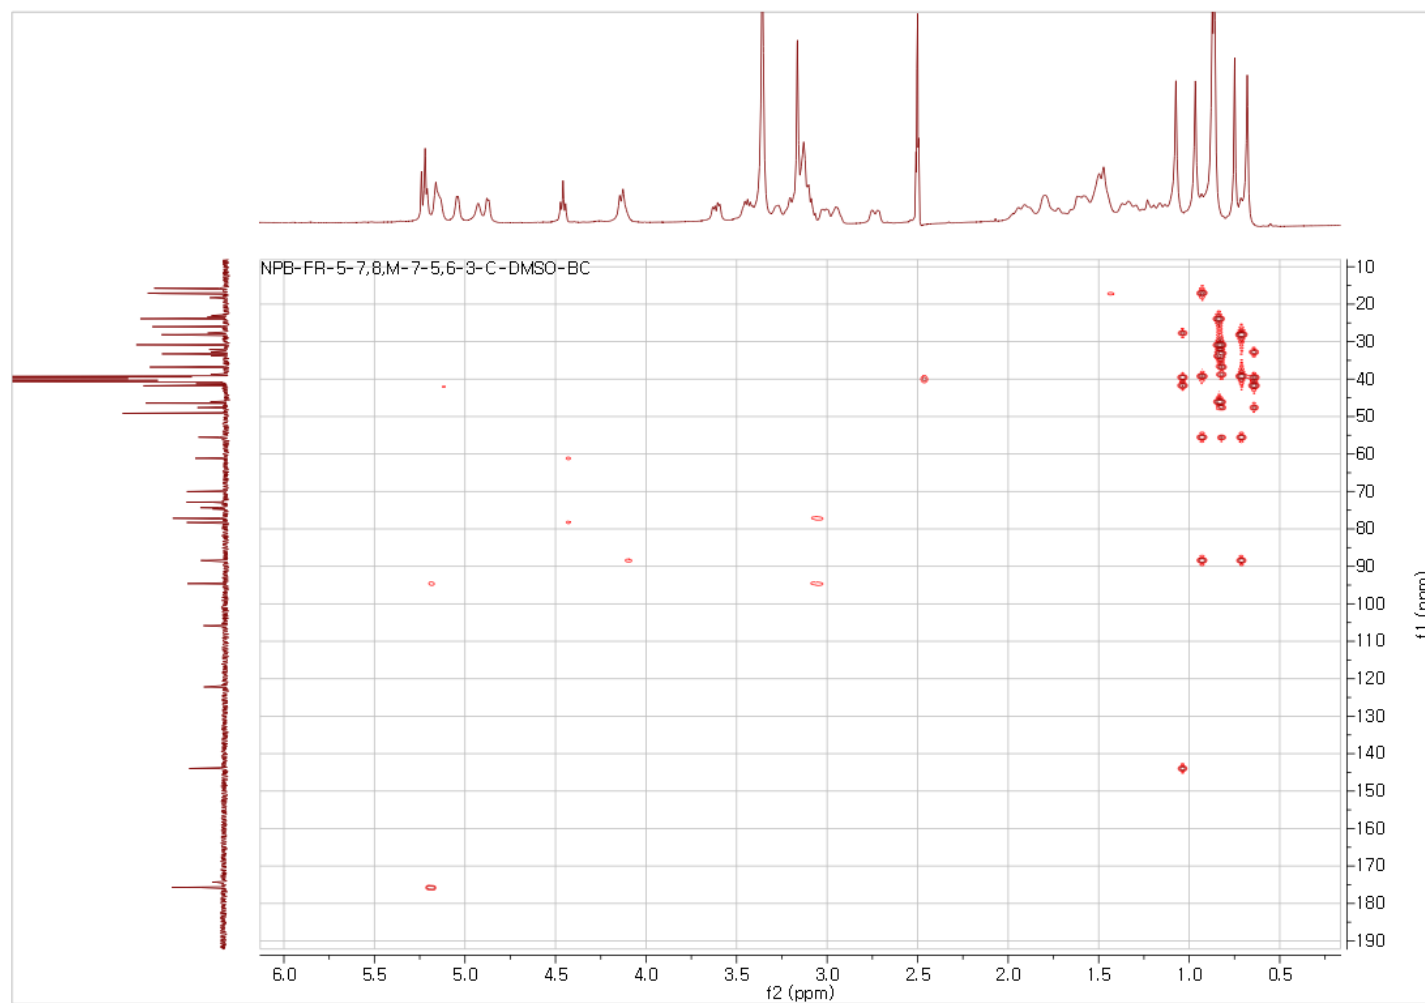



**Figure S7.** The  $^1\text{H}$  NMR spectrum of compound **3** ( $\text{DMSO}-d_6$ , 400 MHz)

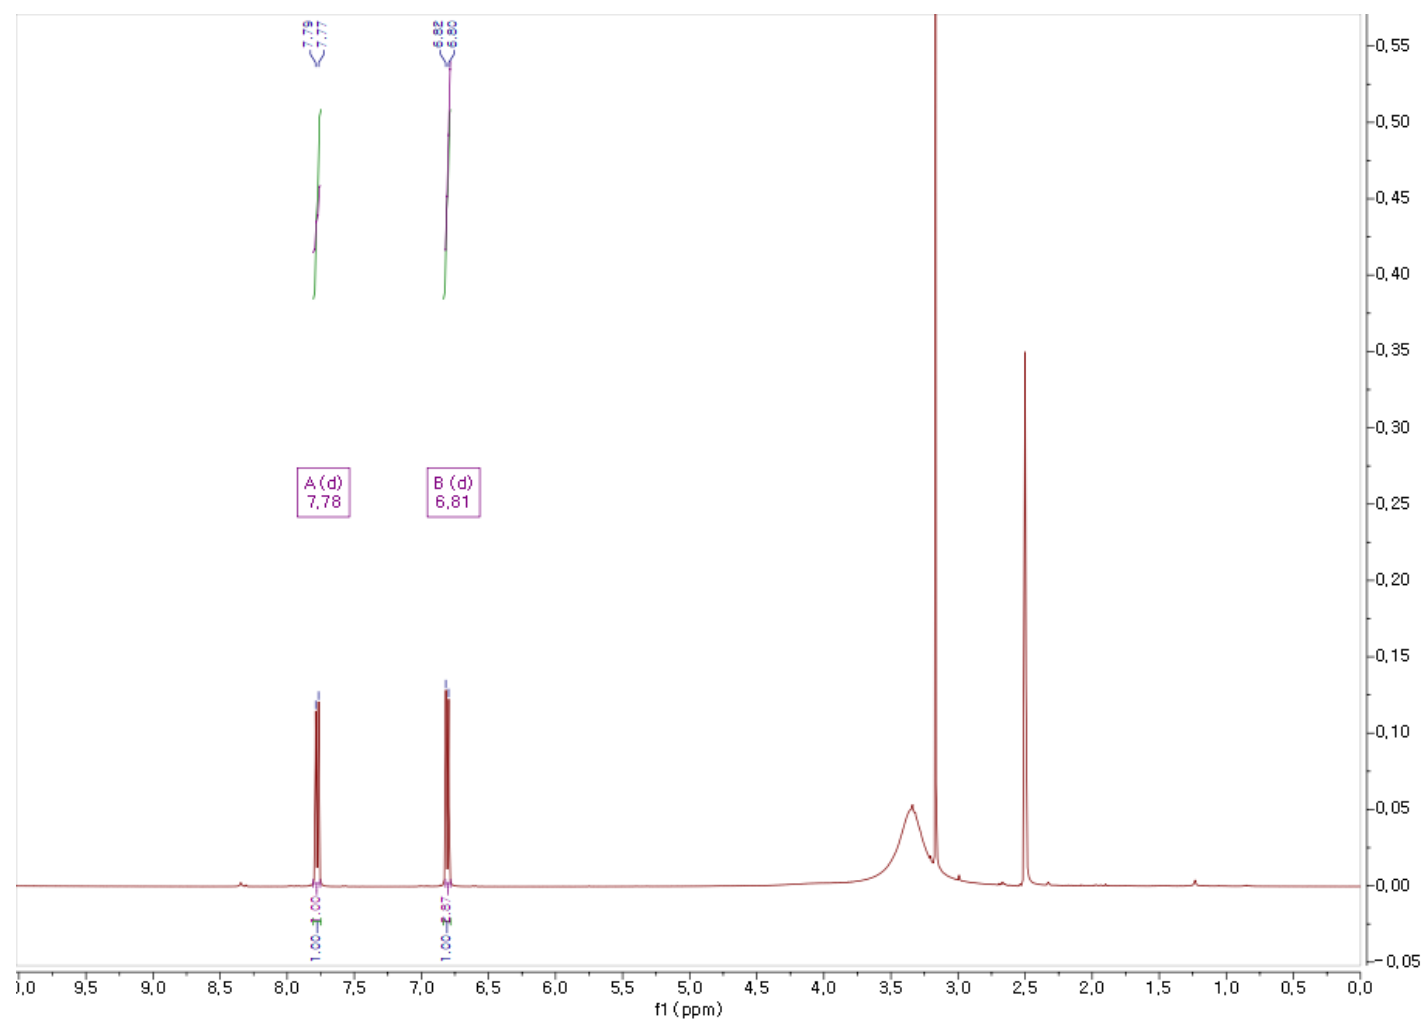

[illegible]

**Figure S9.** The  $^1\text{H}$  NMR spectrum of compound **5** ( $\text{DMSO}-d_6$ , 400 MHz)

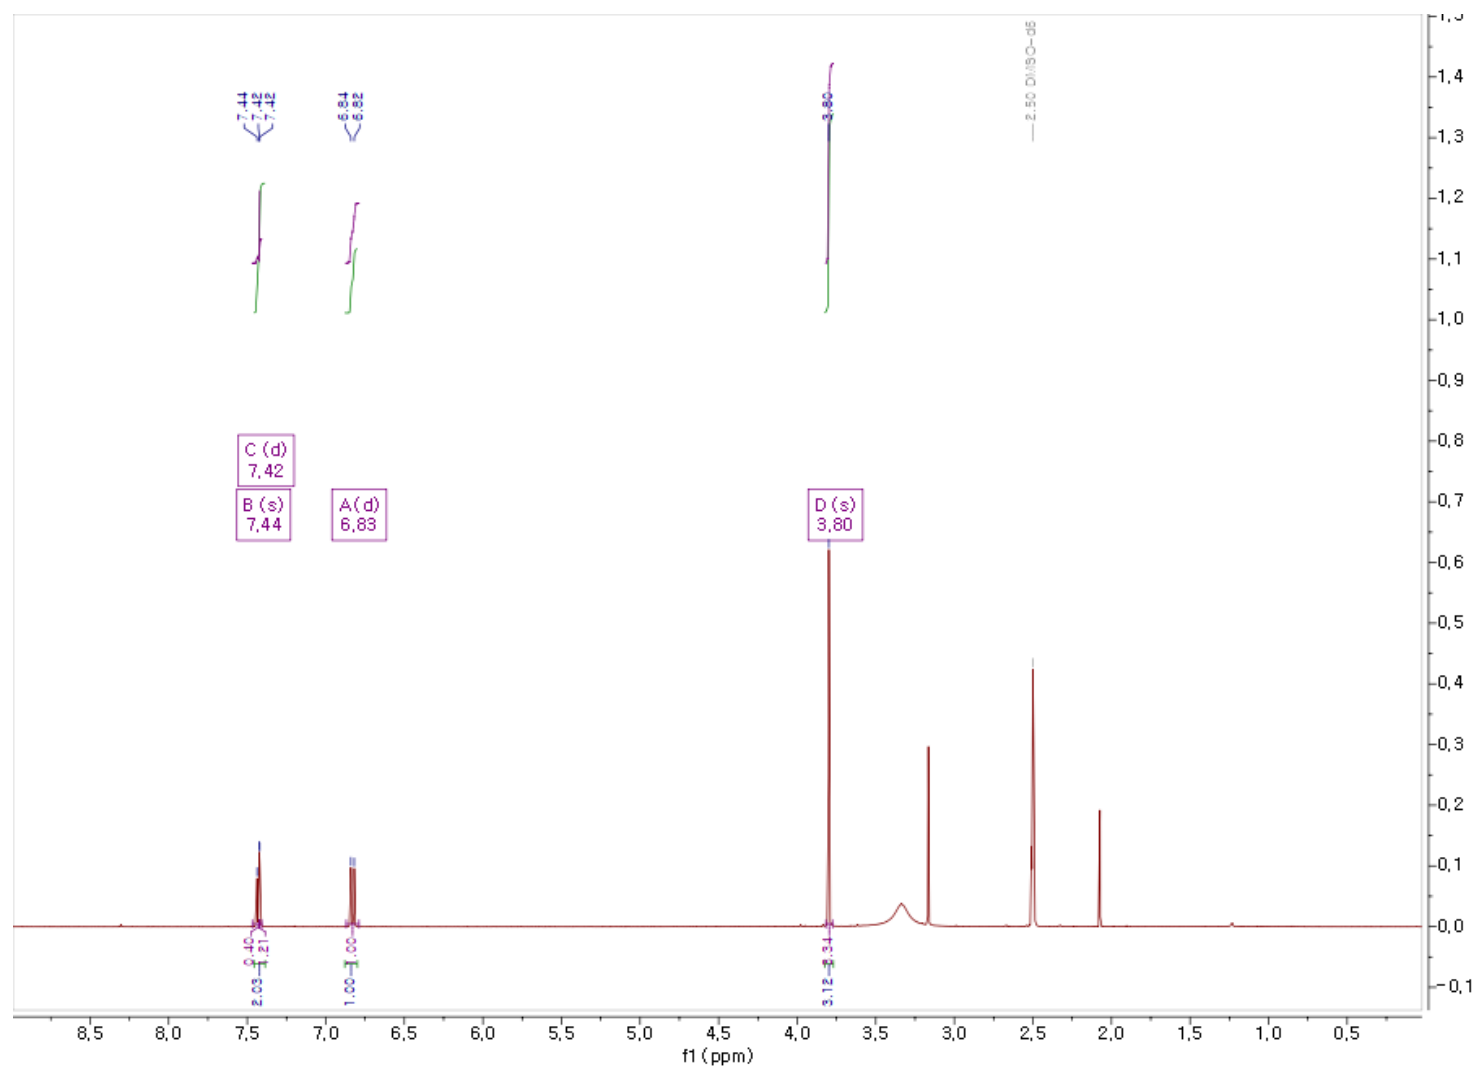

**Figure S10.** The  $^1\text{H}$  NMR spectrum of compound **6** ( $\text{DMSO}-d_6$ , 400 MHz)

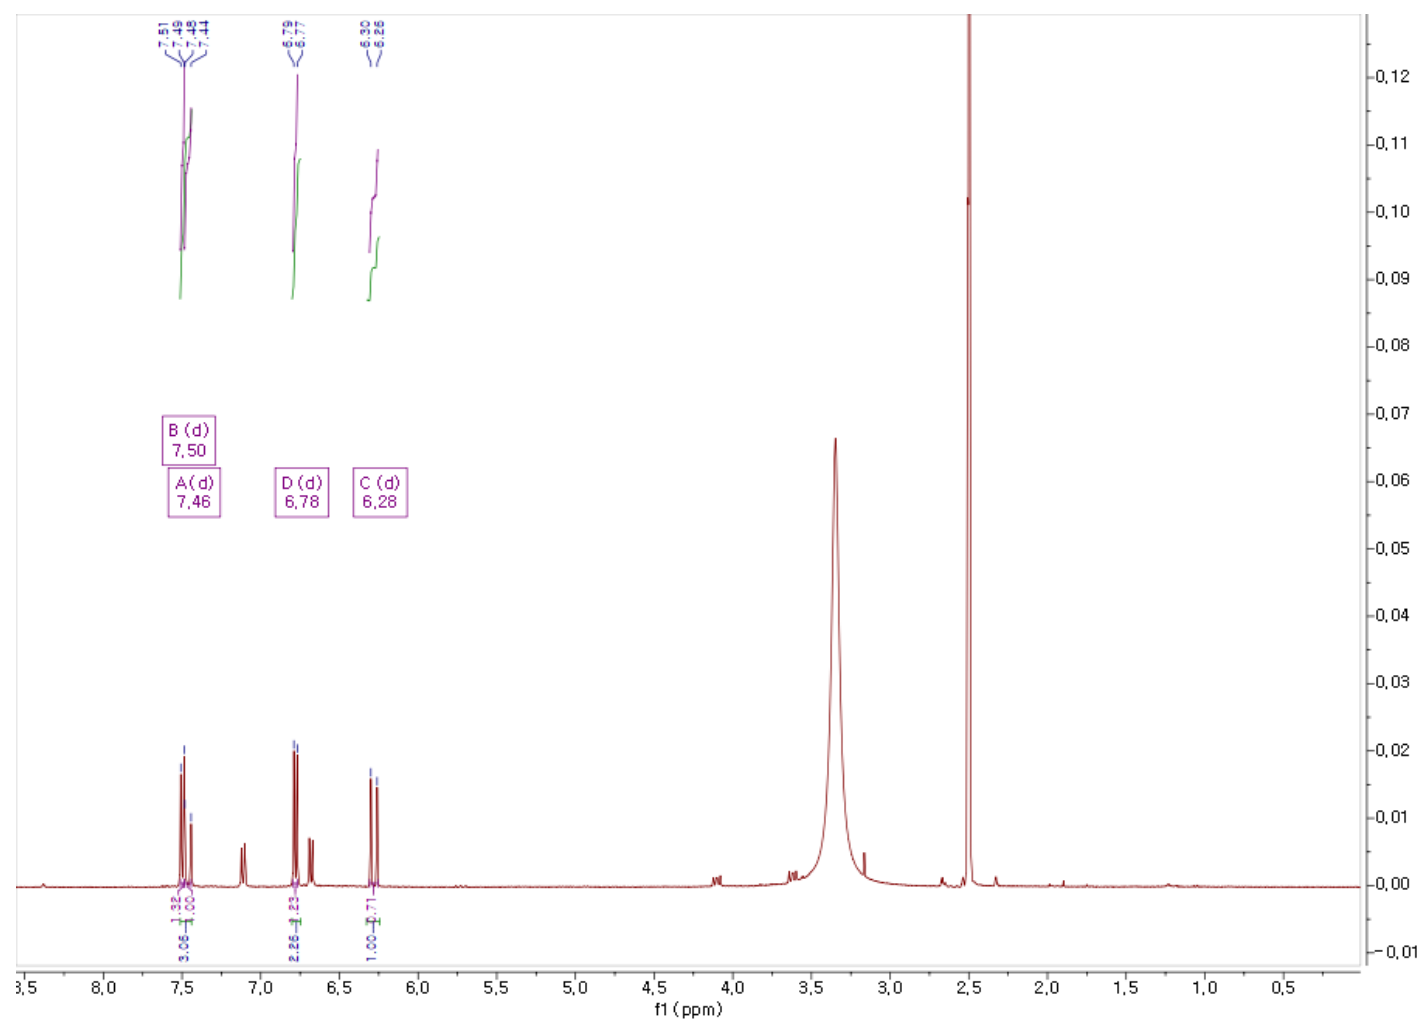

**Figure S11.** The  $^1\text{H}$  NMR spectrum of compound **7** ( $\text{DMSO}-d_6$ , 400 MHz)

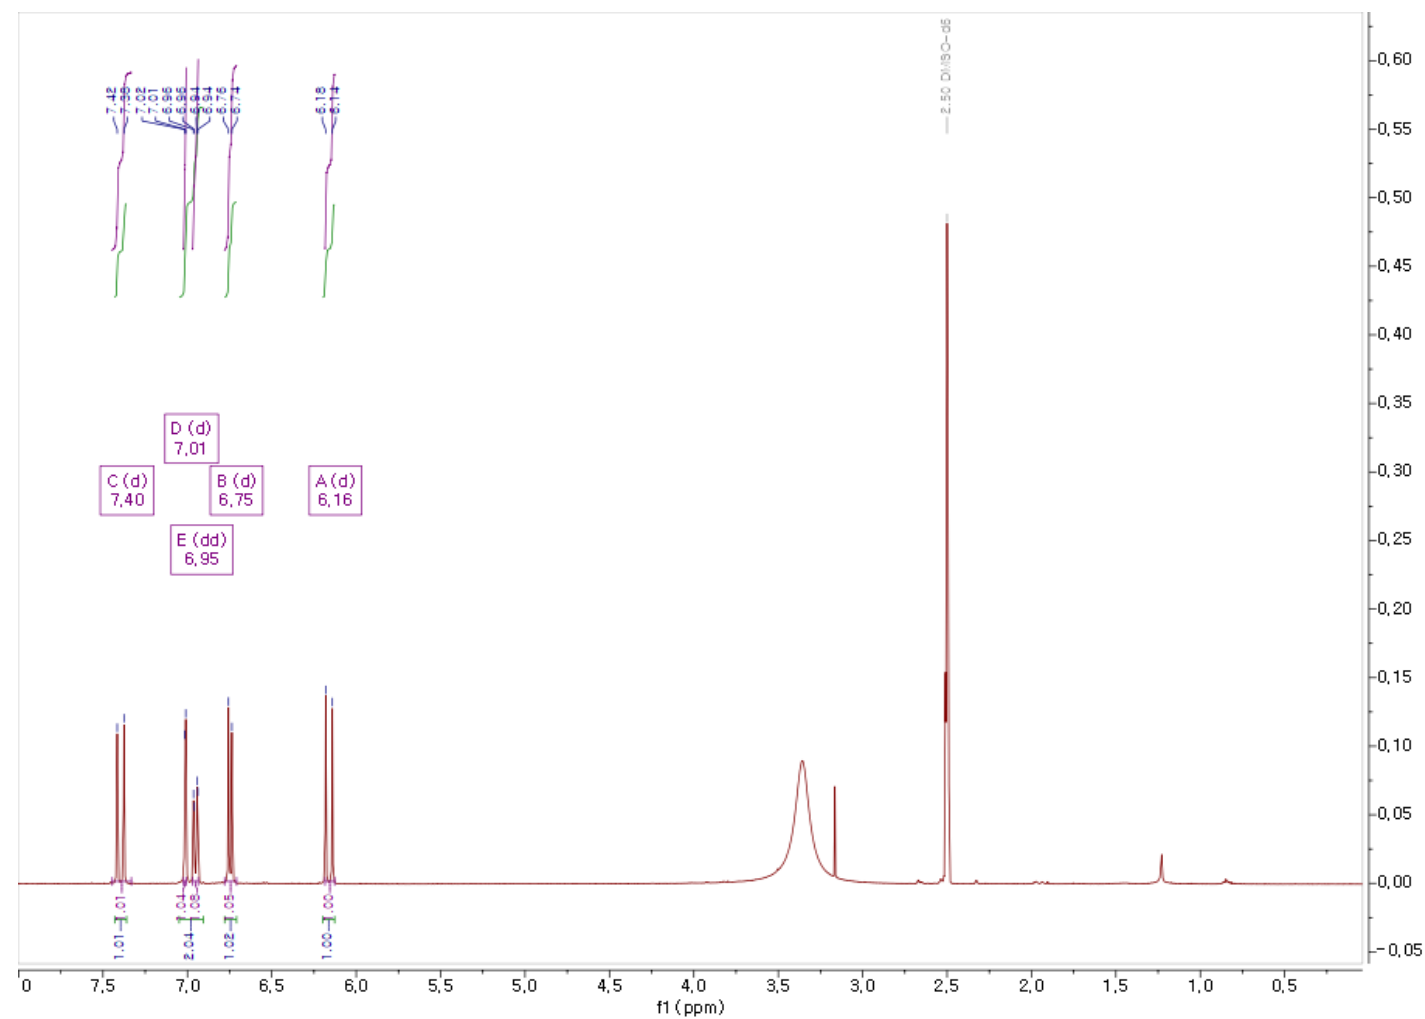

**Figure S12.** The  $^1\text{H}$  NMR spectrum of compound **8** ( $\text{DMSO-}d_6$ , 400 MHz)

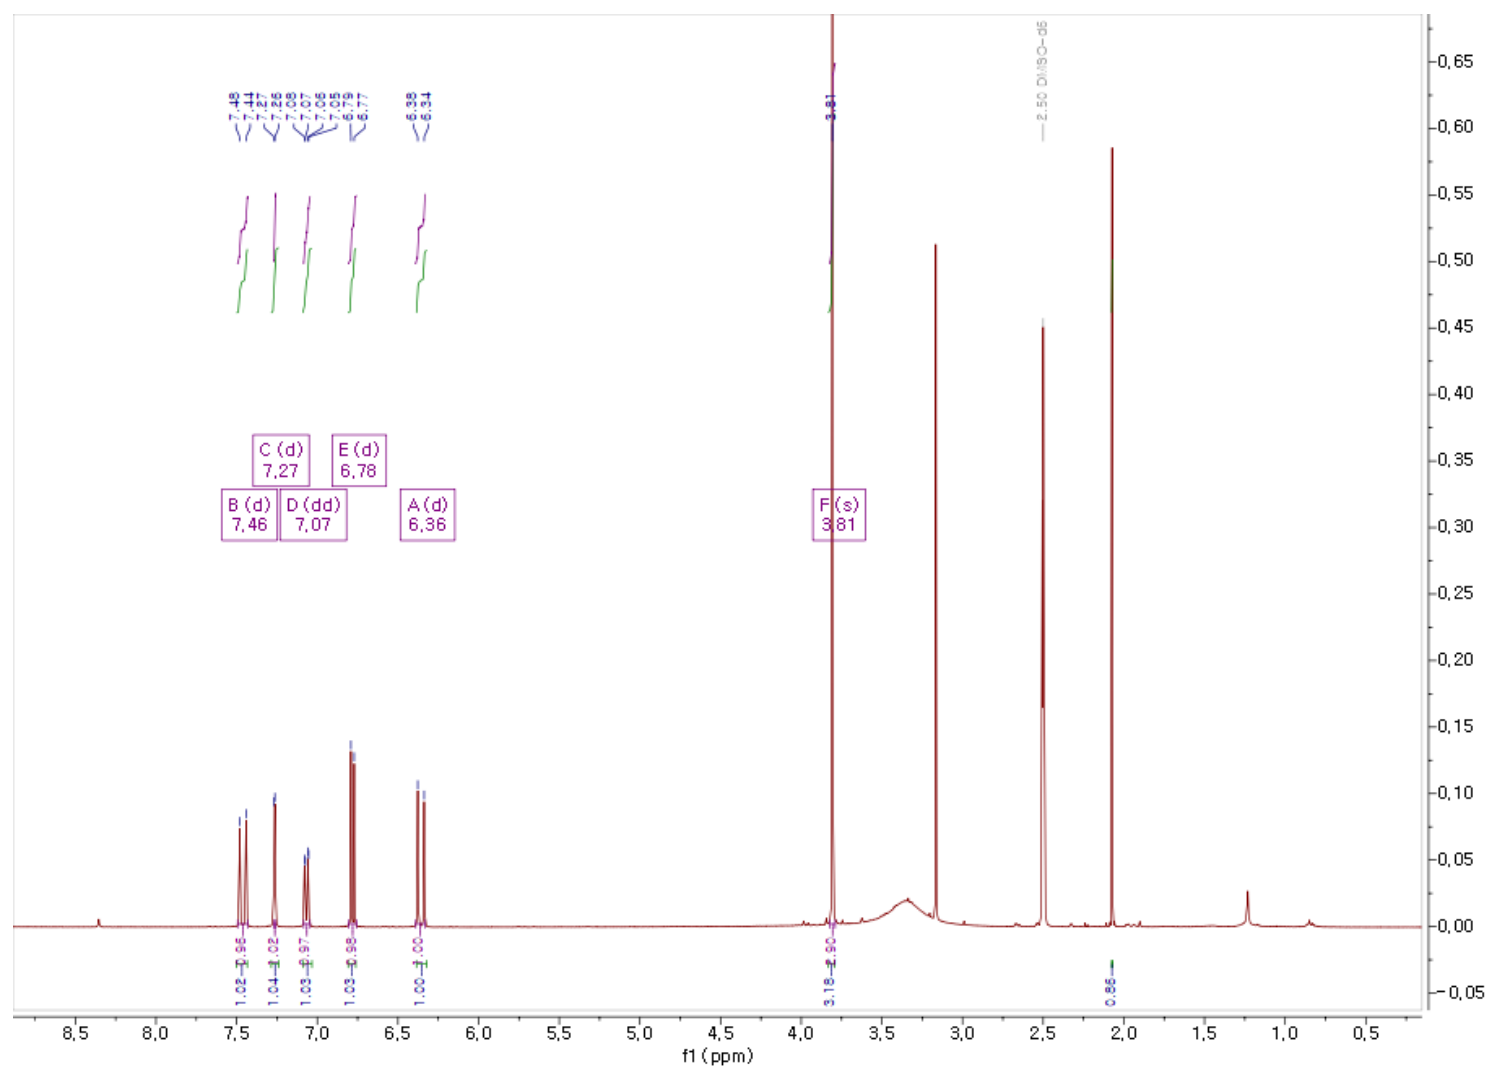

**Figure S13.** The  $^1\text{H}$  NMR spectrum of compound **9** ( $\text{DMSO}-d_6$ , 400 MHz)

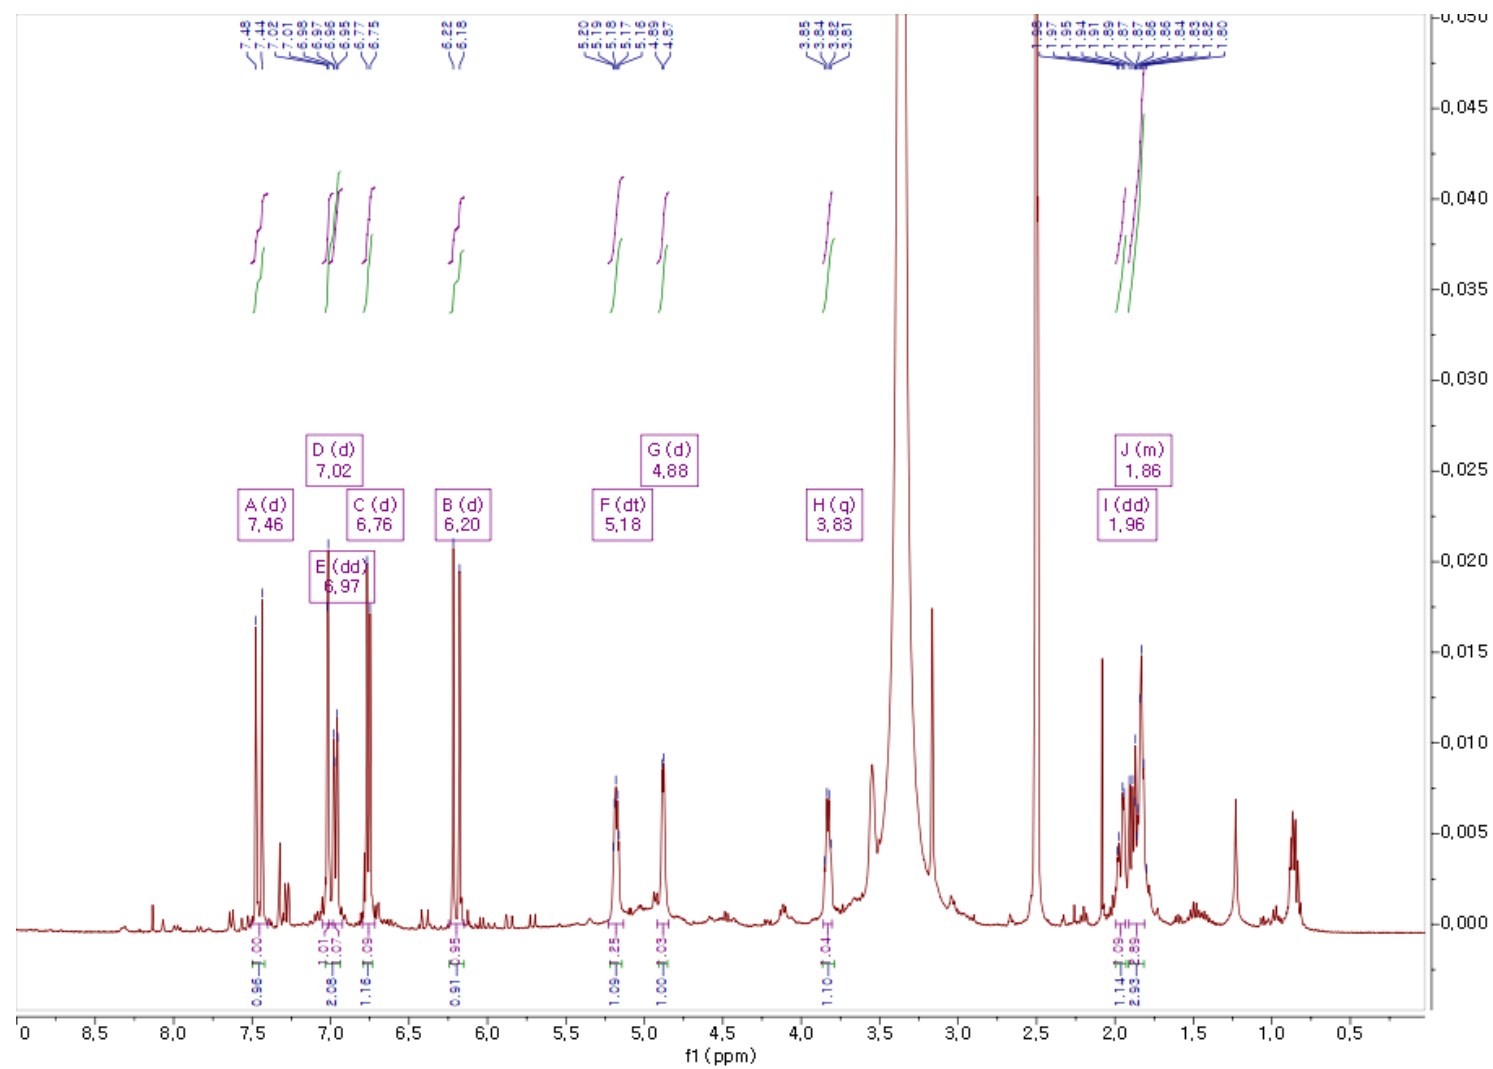





**Figure S15.** The  $^1\text{H}$  NMR spectrum of compound **11** ( $\text{DMSO}-d_6$ , 400 MHz)

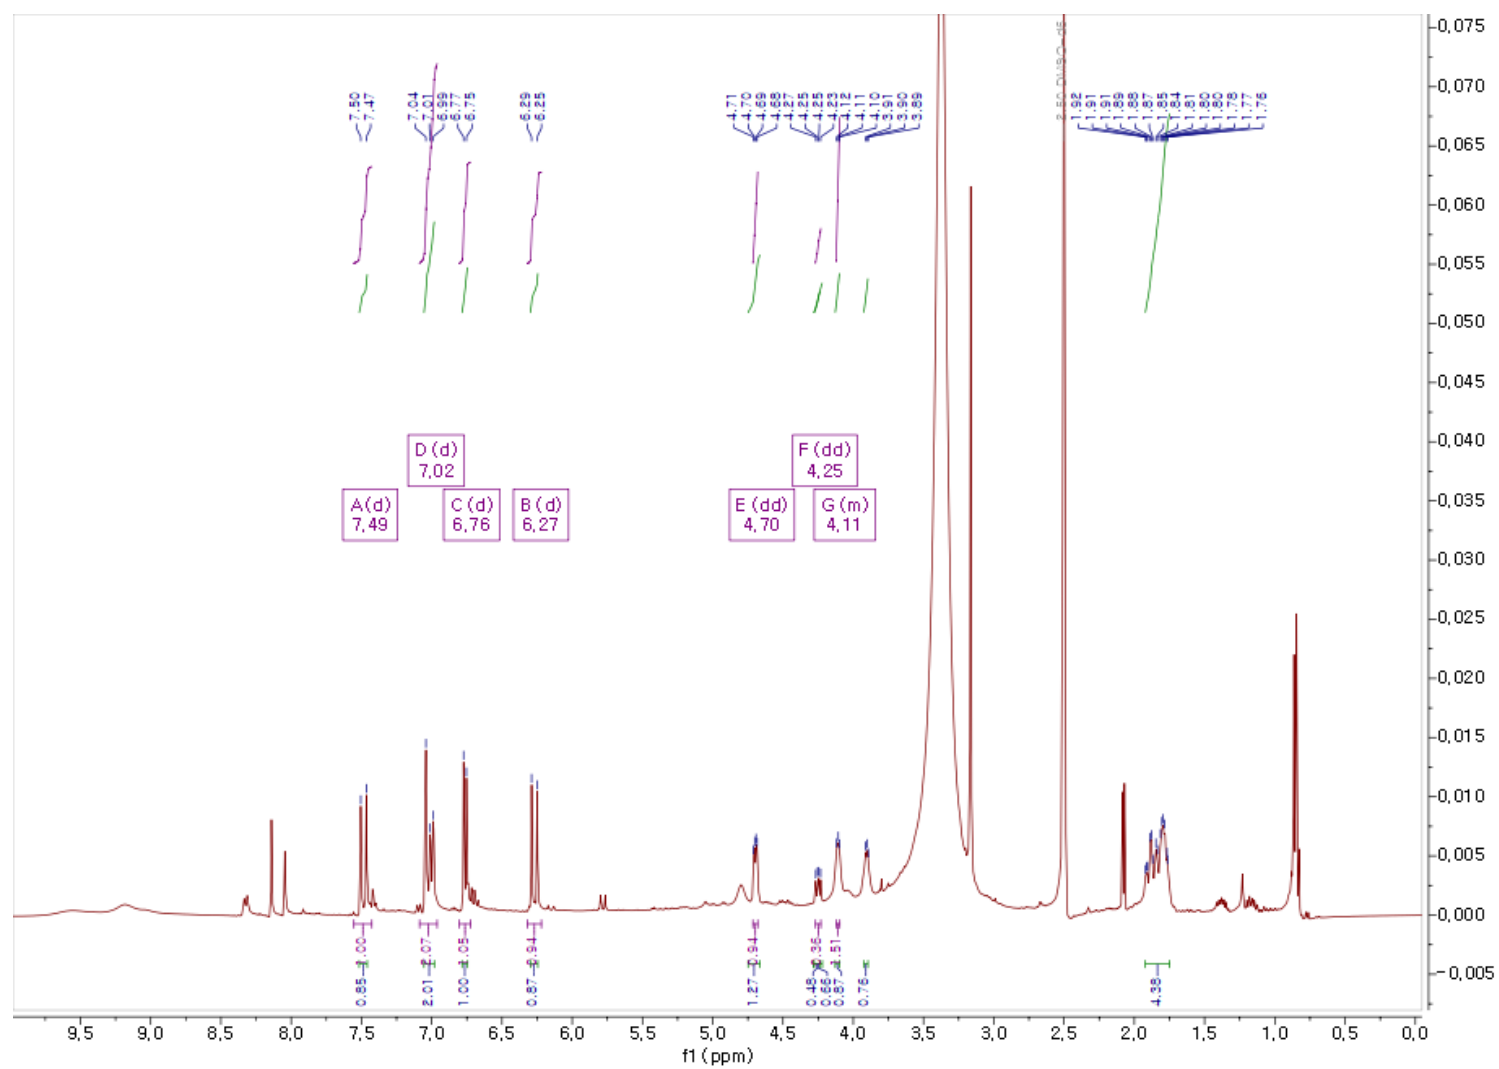

**Figure S16.** The  $^1\text{H}$  NMR spectrum of compound **12** ( $\text{DMSO}-d_6$ , 400 MHz)

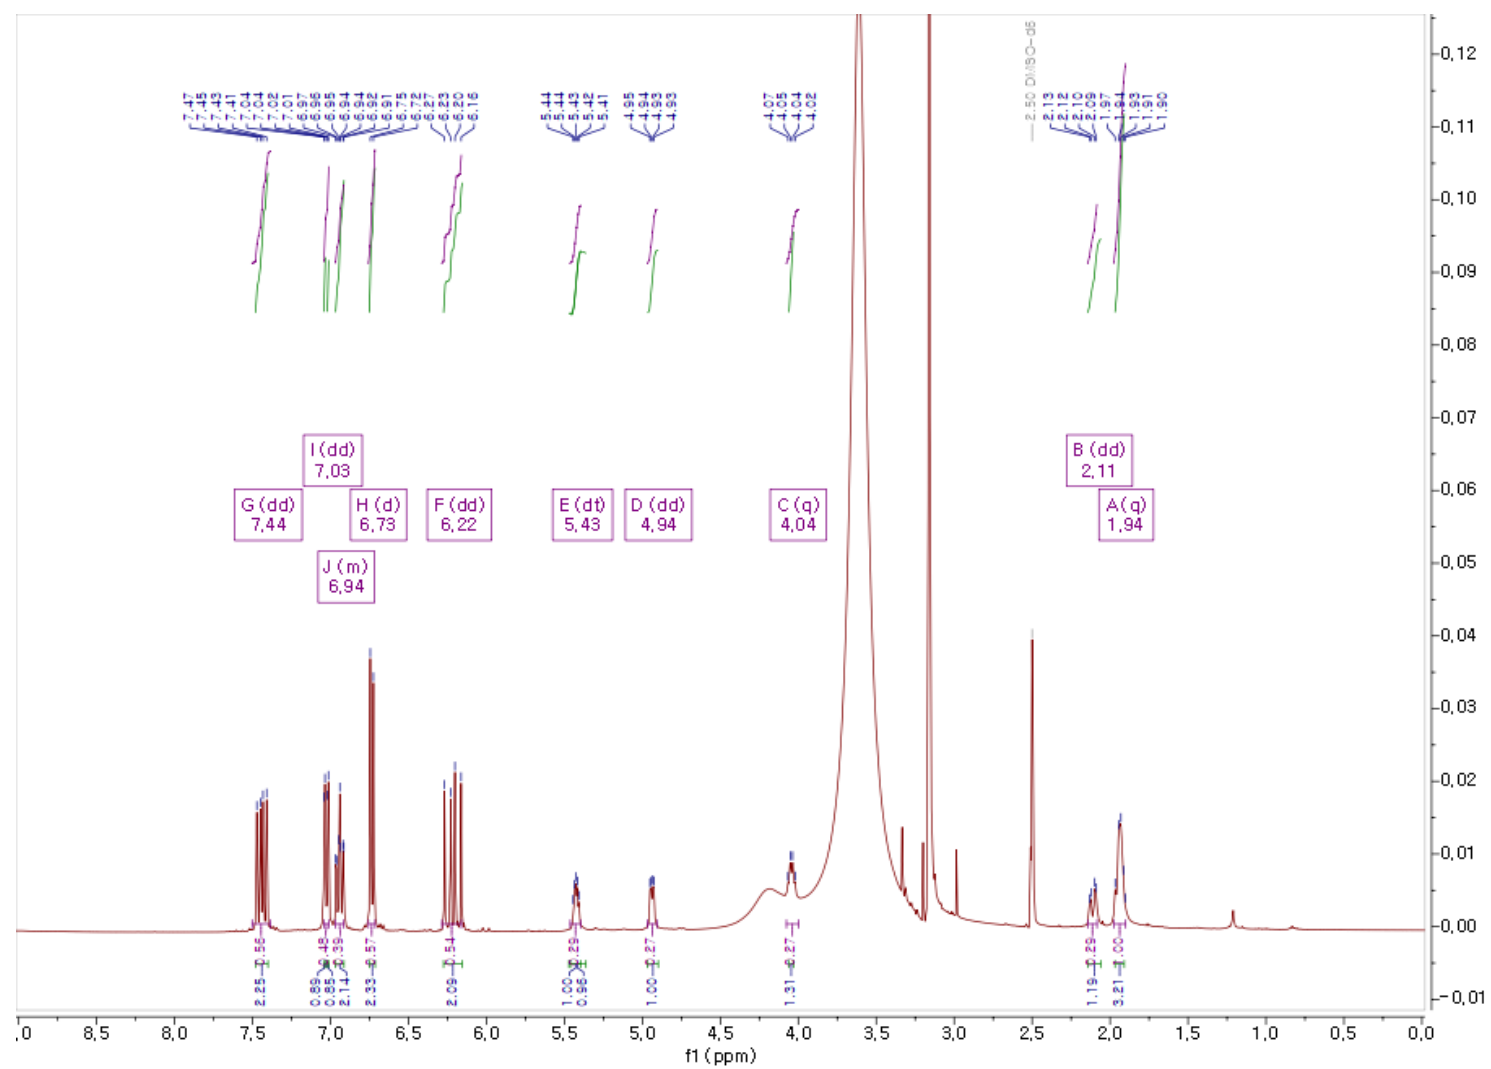

**Figure S17.** The  $^1\text{H}$  NMR spectrum of compound **13** ( $\text{DMSO}-d_6$ , 400 MHz)

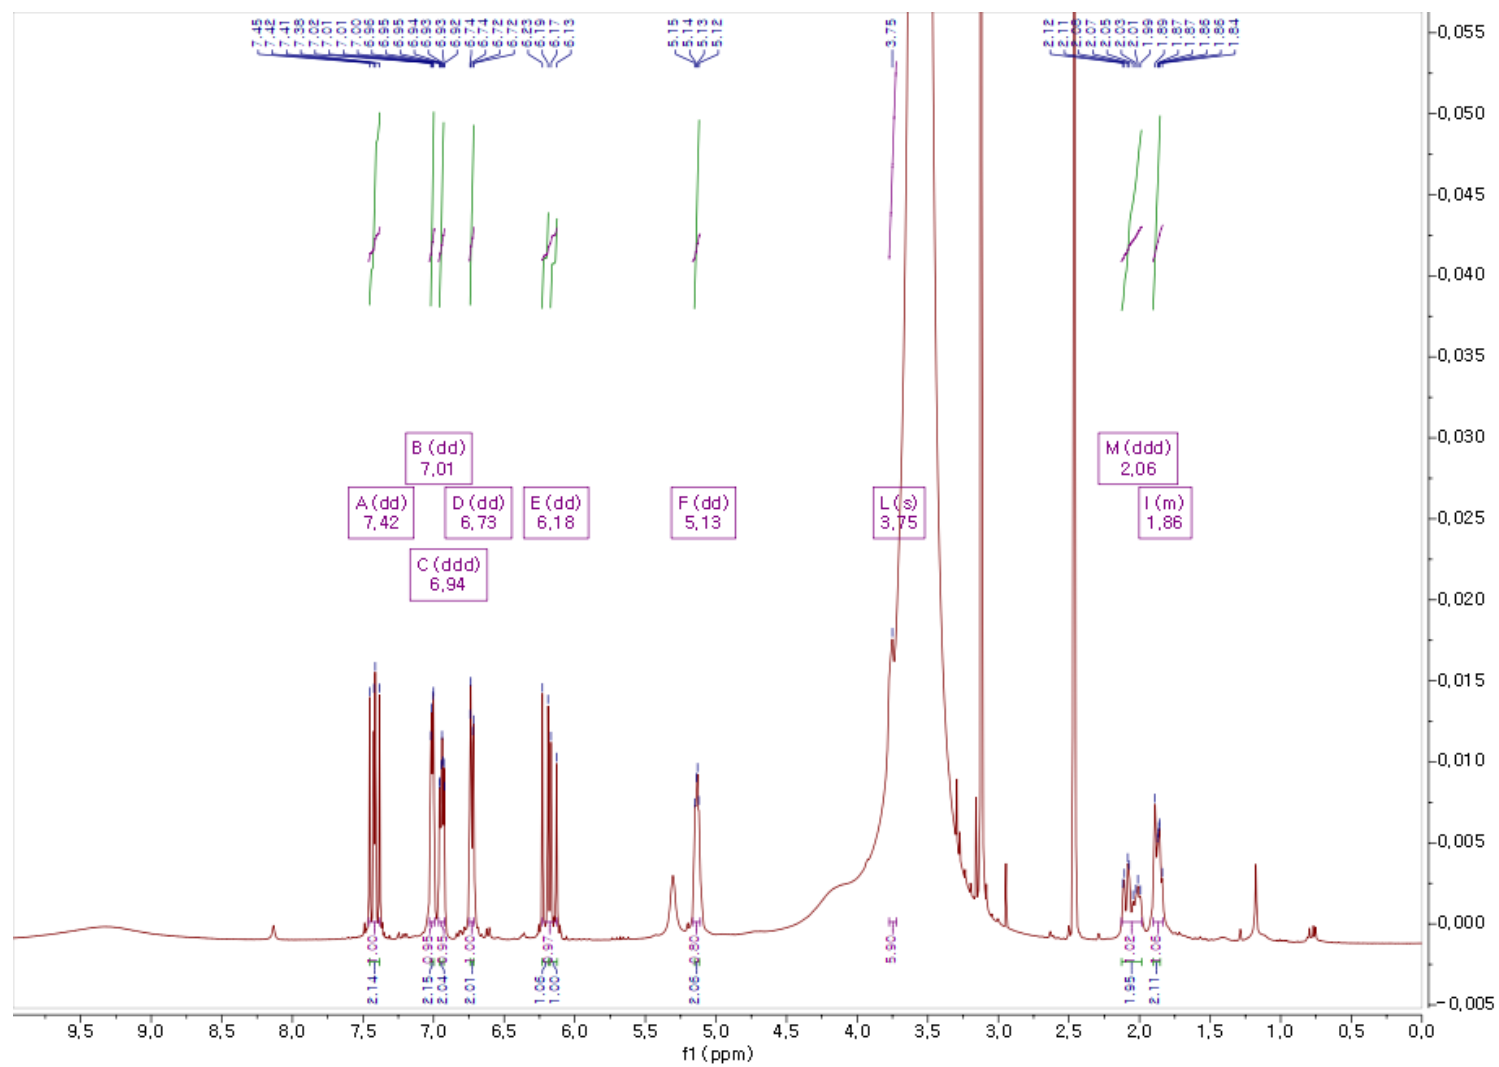

**Figure S18.** The  $^1\text{H}$  NMR spectrum of compound **14** ( $\text{DMSO}-d_6$ , 400 MHz)

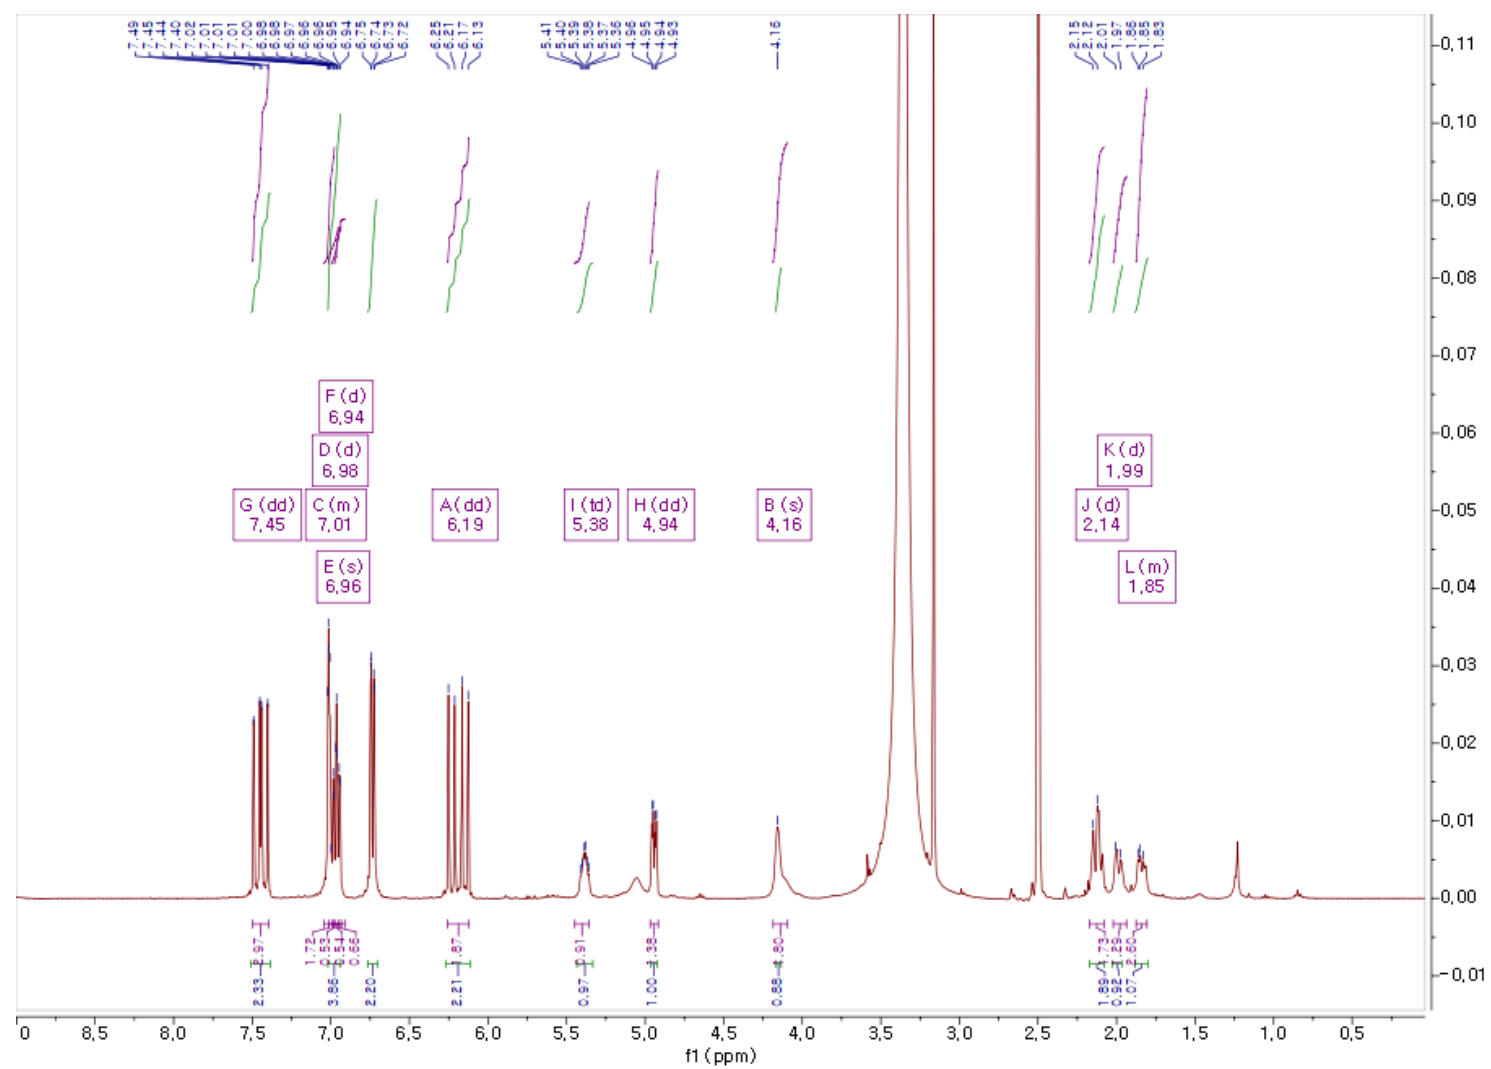

**Figure S19.** The  $^1\text{H}$  NMR spectrum of compound **15** ( $\text{DMSO}-d_6$ , 400 MHz)

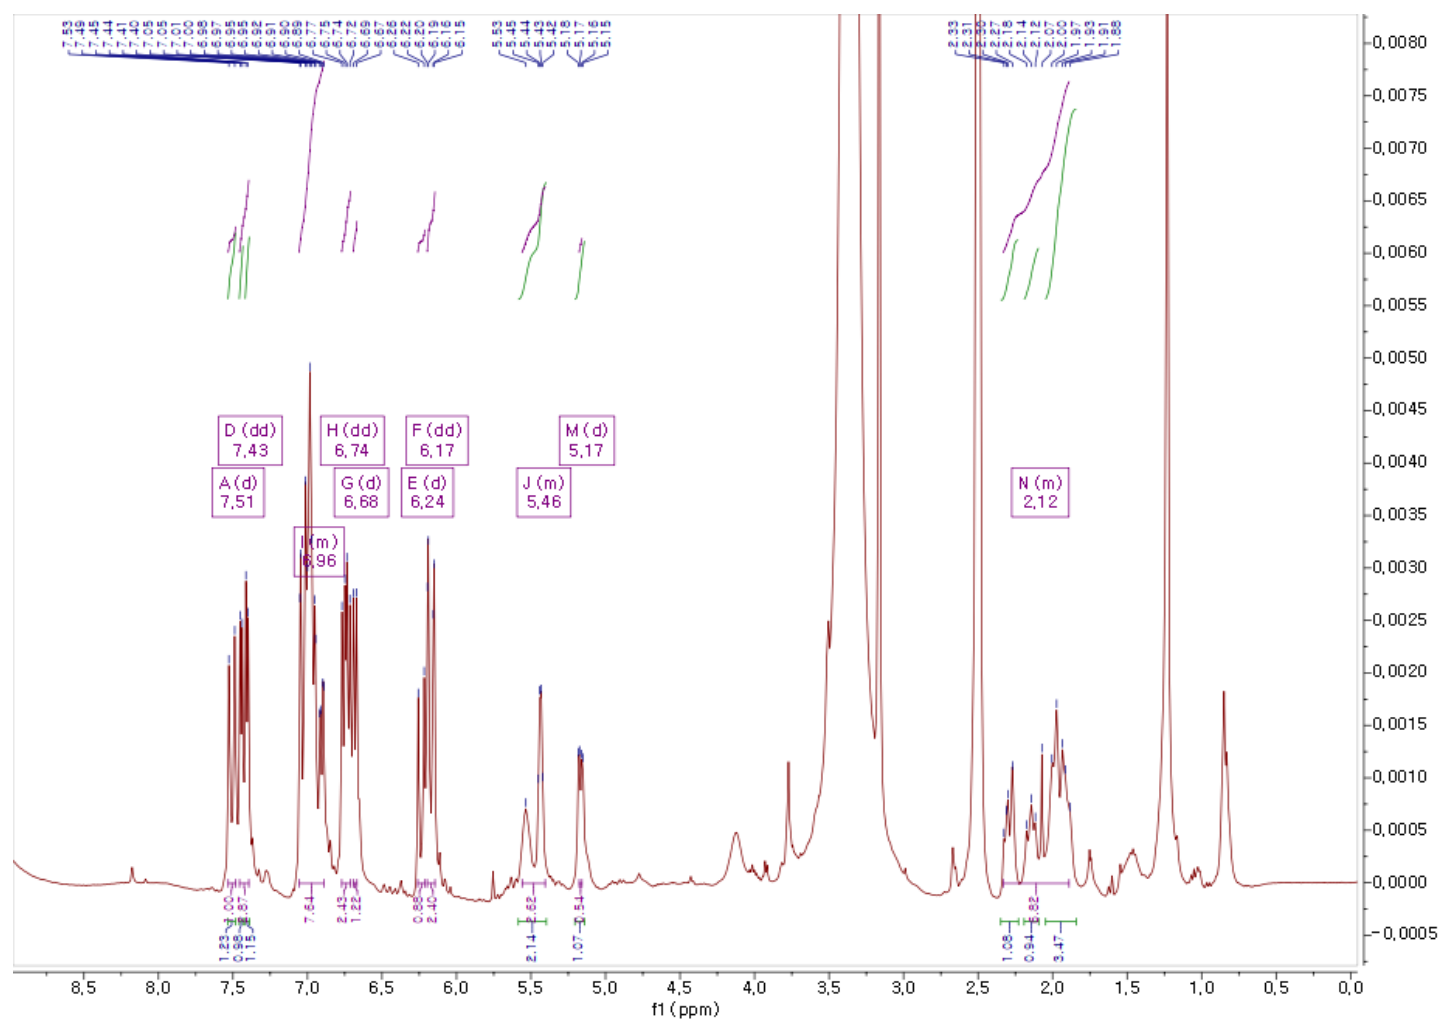

Supplement: s1 [file s1]
